# Supplementary material for: Vitamin D Status among Women in a Rural District of Nepal: Determinants and Association with Metabolic Profile—A Population-Based Study
Source: Nutrients. 2022 May 31;14(11):2309. doi: 10.3390/nu14112309 (PMC9182746; doi:10.3390/nu14112309)
Supplement: Supplementary file 1 [file nutrients-14-02309-s001.zip › nutrients-1728440-supplementary.pdf]

**Table S1.** Department of Clinical Biochemistry, Dhulikhel Hospital.

| Test                  | Unit     | Reference values                                                                                                                 | Method            |
|-----------------------|----------|----------------------------------------------------------------------------------------------------------------------------------|-------------------|
| Glycosylated Hb/HbA1c | mmol/mol | Normal: 26-38 mmol/mol<br>Pre-Diabetes:39-47 mmol/mol<br>Diabetes: $\geq 48$ mmol/mol                                            | HPLC              |
| 25-OH-Vit D Total     | nmol/L   | Vitamin D sufficiency: $>75$ nmol/L<br>Vitamin D insufficiency: 25-75 nmol/L<br>Vitamin D deficiency: $< 25$ nmol/L              | LIAISON (CLIA)    |
| Calcium-Total         | mmol/L   | 2.1-2.6 mmol/L                                                                                                                   | C                 |
| Phosphorus, Inorganic | mmol/L   | 0.8-1.5 mmol/L                                                                                                                   | C                 |
| Cholesterol, Total    | mmol/L   | $<5.2$ mmol/L: Desirable; 5.2-6.2 mmol/L: Borderline high; High $> 6.2$ mmol/L                                                   | CHODA             |
| HDL-Cholesterol       | mmol/L   | Desirable M 1.6 mmol/L & F $> 1.9$ mmol/L, acceptable: 0.9 -1.2 mmol/L Low: 0.9 mmol/L                                           | Direct estimation |
| LDL-Cholesterol       | mmol/L   | $< 2.6$ mmol/L: Optimal, 2.6-3.3 mmol/L; Above, 3.3-4.1 mmol/L; Borderline High, 4.1-4.9 mmol/L; High, $> 4.9$ mmol/L; Very High | Direct estimation |
| Triglycerides         | mmol/L   | $< 1.7$ mmol/L; Normal, 1.7- 2.2 mmol/L; Borderline High, 2.3- 5.6 mmol/L; High, $> 5.6$ mmol/L; very High                       | Enzyme            |
| PTH                   | pg/mL    | 6.5 – 36.8 pg/mL                                                                                                                 | LIASION           |

HPLC; High Performance Liquid Chromatography

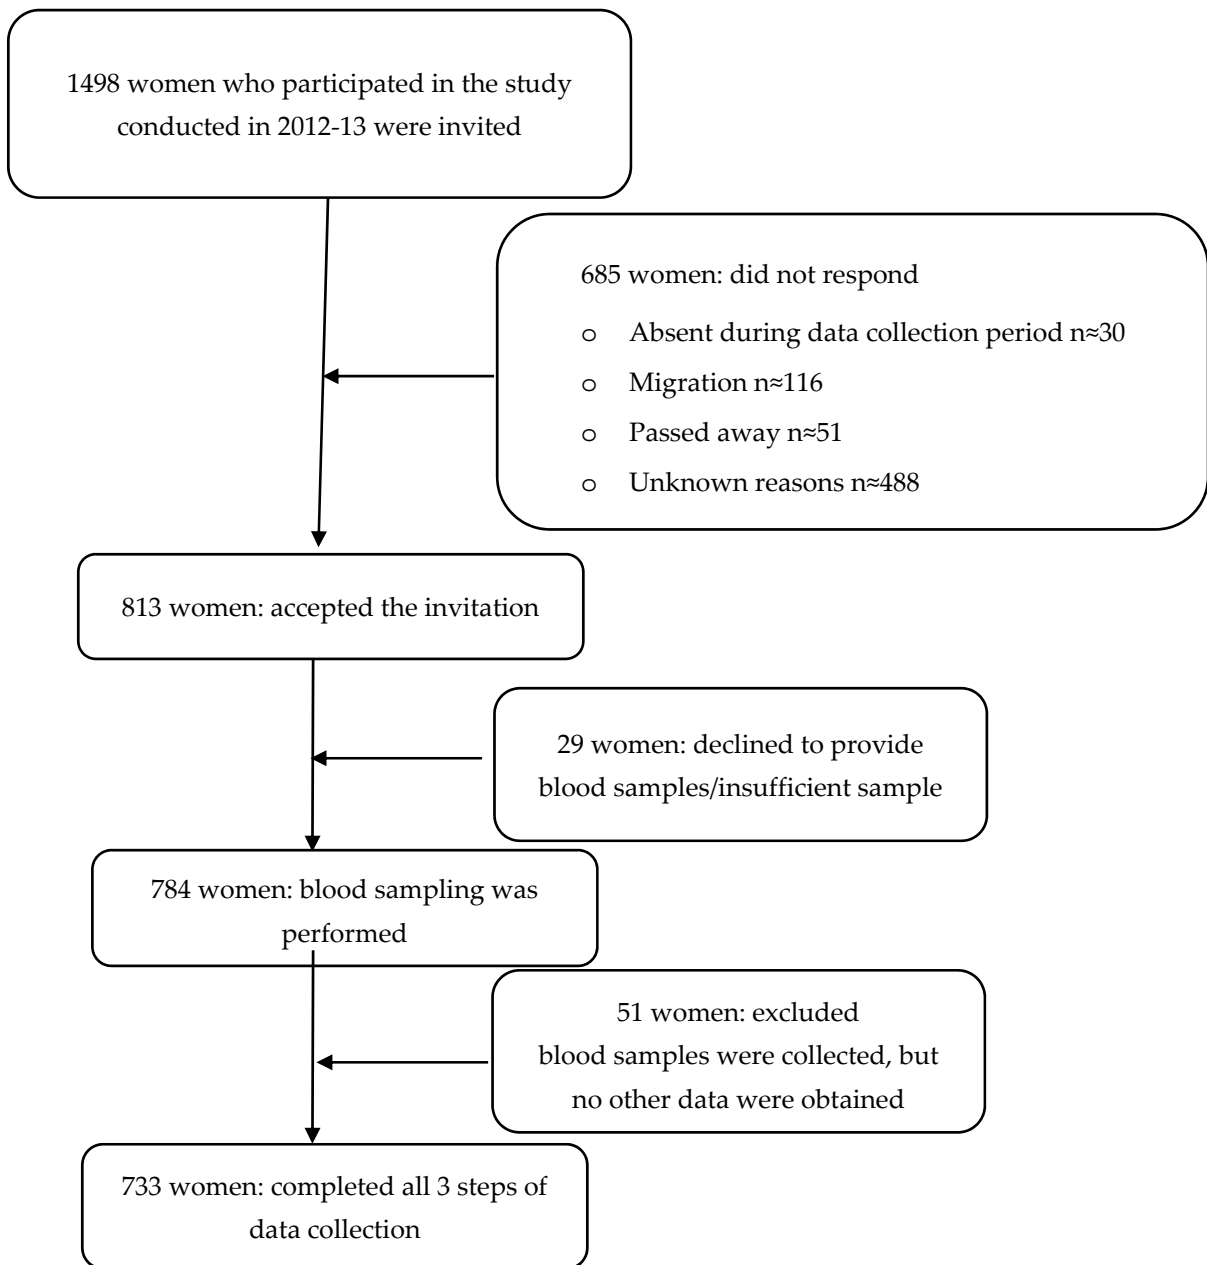

**Figure S1: Flow diagram of study population.**
